# Supplementary material for: Myostatin is associated with the presence and development of acute-on-chronic liver failure
Source: PubMed Central journal article supplement (PMC10405090; doi:10.1016/j.jhepr.2023.100761), 2023-04-14
Supplement: mmc1.pdf [file mmc1.pdf]

# **Myostatin is associated with the presence and development of acute-on-chronic liver failure**

Astrid Ruiz-Margáin, Alessandra Pohlmann, Silke Lanzerath, Melanie Langheinrich, Alejandro Campos-Murguía, Berenice M. Román-Calleja, Robert Schierwagen, Sabine Klein, Frank Erhard Uschner, Maximilian Joseph Brol, Aldo Torre-Delgadillo, Nayelli C. Flores-García, Michael Praktijnjo, Ricardo U. Macías Rodríguez, Jonel Trebicka

## Table of contents

|               |   |
|---------------|---|
| Fig. S1.....  | 2 |
| Fig. S2.....  | 3 |
| Table S1..... | 4 |
| Table S2..... | 5 |
| Table S3..... | 6 |

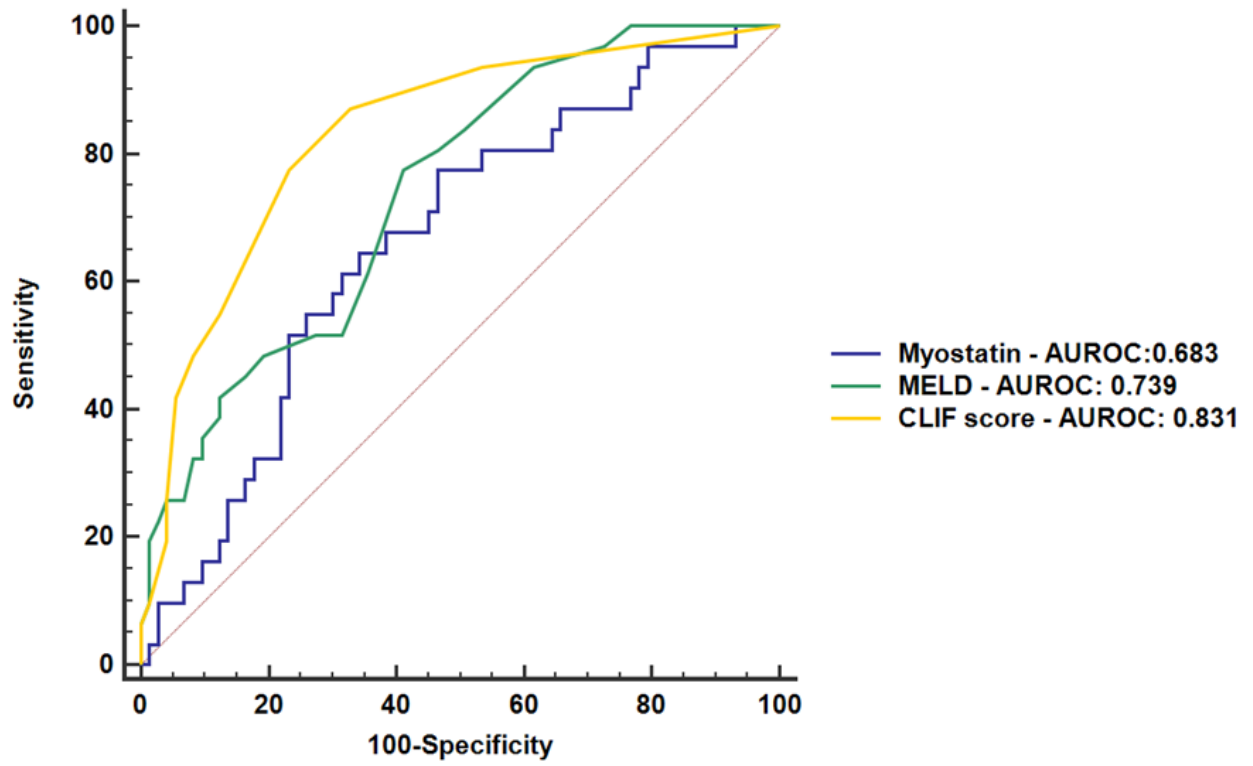

**Fig. S1.** Comparison of AUROC for myostatin, MELD and CLIF scores.

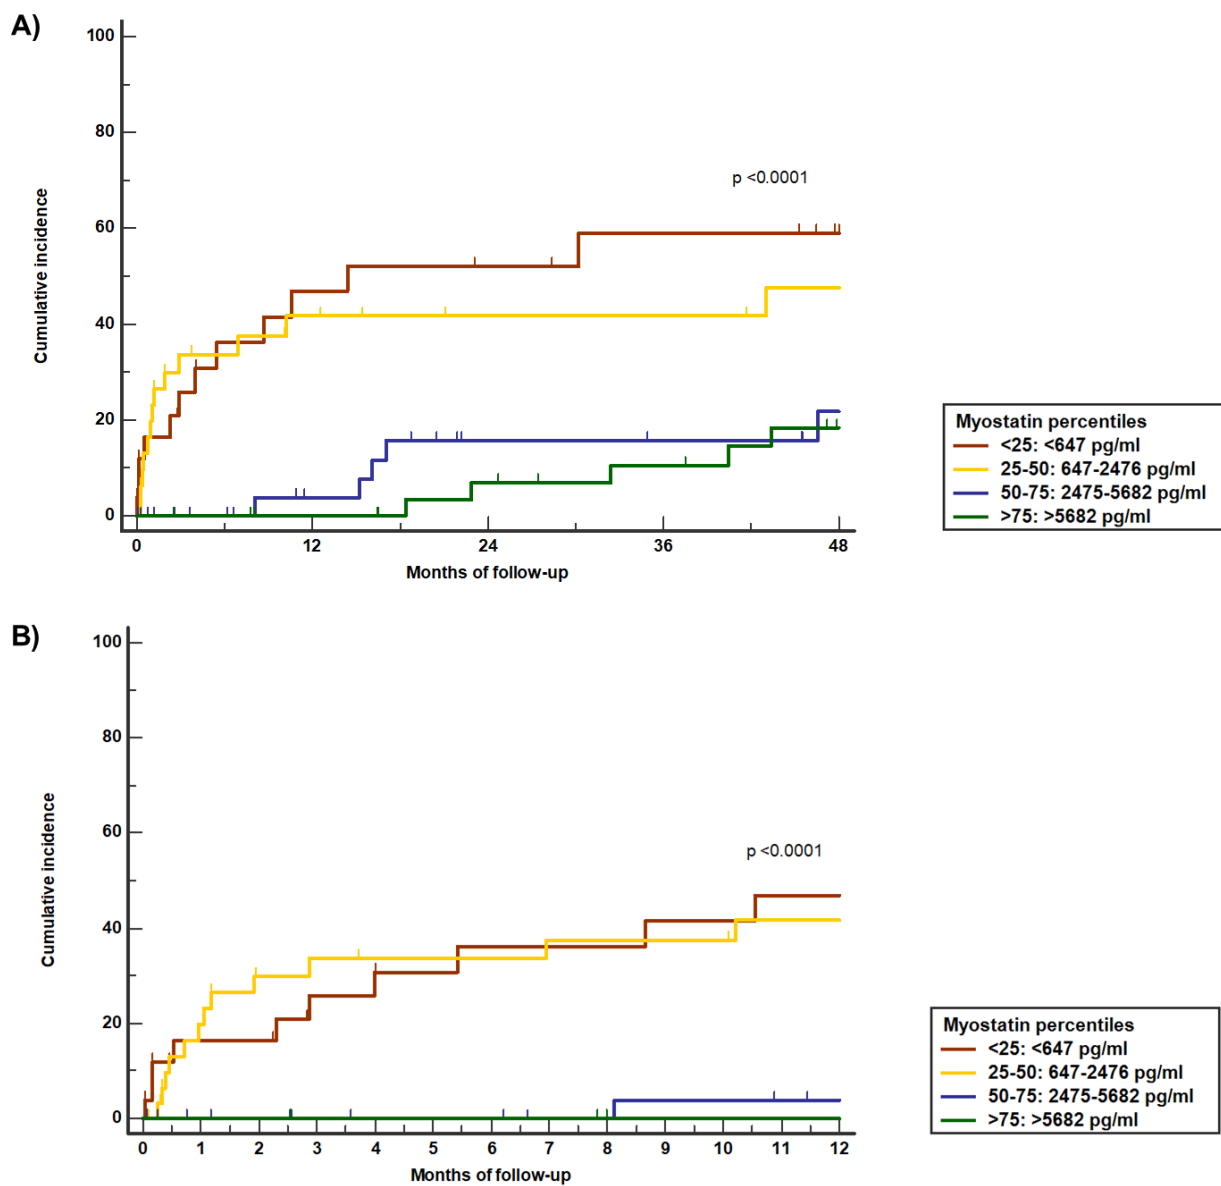

**Fig. S2.** Incidence of ACLF according to myostatin percentiles (A) and incidence of ACLF according to myostatin percentiles during first 12 months (B).

| <b>Table S1. Main characteristics of patients according to ACLF grade</b>                                                                                                                                                                                                                                                                                                                                                                    |                            |                            |                            |                            |
|----------------------------------------------------------------------------------------------------------------------------------------------------------------------------------------------------------------------------------------------------------------------------------------------------------------------------------------------------------------------------------------------------------------------------------------------|----------------------------|----------------------------|----------------------------|----------------------------|
|                                                                                                                                                                                                                                                                                                                                                                                                                                              | <b>ACLF<br/>(n = 48)</b>   | <b>ACLF 1<br/>(n = 6)</b>  | <b>ACLF 2<br/>(n = 15)</b> | <b>ACLF 3<br/>(n = 27)</b> |
| <b>Age (years)</b>                                                                                                                                                                                                                                                                                                                                                                                                                           | 51 ± 15                    | 51 ± 16                    | 53 ± 11                    | 49 ± 16                    |
| <b>Sex (F/M) (%)</b>                                                                                                                                                                                                                                                                                                                                                                                                                         | 46/54                      | 67/33                      | 40/60                      | 44.4/55.6                  |
| <b>MELD score</b>                                                                                                                                                                                                                                                                                                                                                                                                                            | 20 ± 9                     | 16.8 ± 3.7                 | 18.3 ± 10                  | 21.9 ± 9.3 <sup>#</sup>    |
| <b>MELD Na score</b>                                                                                                                                                                                                                                                                                                                                                                                                                         | 21 ± 8                     | 19.3 ± 4.2                 | 19.8 ± 9.5                 | 22.4 ± 8.3                 |
| <b>Myostatin (pg/ml)</b>                                                                                                                                                                                                                                                                                                                                                                                                                     | 984 (278-2624)             | 1009 (194-4341)            | 1025 (281-3064)            | 960 (318-2483)             |
| <b>PhA°</b>                                                                                                                                                                                                                                                                                                                                                                                                                                  | 3.8 (3.3-5.0)<br>5.0 ± 1.0 | 3.4 (2.7-4.1)<br>3.6 ± 1.0 | 4.4 (3.3-5)<br>4.3 ± 0.9   | 3.8 (3.3-5.1)<br>4.0 ± 1.1 |
| <b>MAMC</b>                                                                                                                                                                                                                                                                                                                                                                                                                                  | 19.4 ± 3.2                 | 17 ± 1.7 <sup>*</sup>      | 19.1 ± 2.3                 | 20 ± 3.6 <sup>#</sup>      |
| <b>Precipitants of acute decompensation (%)</b>                                                                                                                                                                                                                                                                                                                                                                                              |                            |                            |                            |                            |
| - Infection                                                                                                                                                                                                                                                                                                                                                                                                                                  | 62.5                       | 50                         | 60                         | 66.7                       |
| - Bleeding                                                                                                                                                                                                                                                                                                                                                                                                                                   | 14.6                       | 33.3                       | 6.7                        | 14.8                       |
| - No identified precipitant                                                                                                                                                                                                                                                                                                                                                                                                                  | 8.3                        | -                          | 6.7                        | 11.1                       |
| - Other                                                                                                                                                                                                                                                                                                                                                                                                                                      | 14.6                       | 16.7                       | 26.7                       | 7.4                        |
| <b>LT n (%)</b>                                                                                                                                                                                                                                                                                                                                                                                                                              | 10.4                       | 1 (16.7)                   | 4 (26.7)                   | 0 (0) <sup>  </sup>        |
| <b>Death (%)</b>                                                                                                                                                                                                                                                                                                                                                                                                                             | 79.2                       | 5 (83.3)                   | 10 (66.7)                  | 23 (85.2)                  |
| <p>Data presented as mean ± SD in variables with normal distribution, and median (p25-p75) in variables with non-normal distribution.</p> <p><sup>*</sup>Difference between groups ACLF1 vs ACLF2 (p &lt; 0.05)</p> <p><sup>#</sup> Difference between groups ACLF1 vs ACLF3 (p &lt; 0.05)</p> <p><sup>  </sup> Difference between groups ACLF2 vs ACLF3 (p &lt; 0.05)</p> <p>Student' T test, Mann-Whitney's U and Chi<sup>2</sup> test</p> |                            |                            |                            |                            |

**Table S2. Characteristics according to sex**

|                                     | <b>Male (n = 69)</b> | <b>Female (n = 117)</b> |
|-------------------------------------|----------------------|-------------------------|
| <b>Age (years)</b>                  | 52.2 ± 11.2          | 54.2 ± 15.4             |
| <b>Etiology of cirrhosis (%)</b>    |                      |                         |
| -HCV                                | 24.6                 | 35*                     |
| - NASH / cryptogenic                | 24.6                 | 17.9                    |
| - Autoimmune hepatitis              | 5.8                  | 16.2                    |
| - Alcohol                           | 26.1                 | 1                       |
| - Primary biliary cholangitis       | 2.9                  | 13.7                    |
| - Overlap syndrome                  | 5.8                  | 9.4                     |
| - Other                             | 10.2                 | 6.8                     |
| <b>Child-Pugh (%)</b>               |                      |                         |
| - A                                 | 23.2                 | 34.2 *                  |
| - B                                 | 30.4                 | 35.0                    |
| - C                                 | 46.4                 | 30.8                    |
| <b>Child-Pugh points</b>            | 8.5 ± 2.4            | 7.9 ± 2.5               |
| <b>MELD score</b>                   | 17 ± 9               | 13.5 ± 6 *              |
| <b>MELD Na score</b>                | 19 ± 9               | 15 ± 7*                 |
| <b>Complications (%)</b>            |                      |                         |
| - Ascites                           | 73.9                 | 56.0*                   |
| - Hepatic encephalopathy            | 53.6                 | 41.8                    |
| <b>Total bilirubin (mg/dL)</b>      | 2.7 (1.7-5.6)        | 2 (1.2-3.8)*            |
| <b>Albumin (mg/dL)</b>              | 3.2 ± 0.8            | 3.2 ± 0.7               |
| <b>Creatinine (mg/dL)</b>           | 1.4 ± 1.3            | 1 ± 0.7*                |
| <b>INR</b>                          | 1.4 ± 0.4            | 1.4 ± 0.4               |
| <b>Sodium (mmol/l)</b>              | 136 ± 6              | 137 ± 6                 |
| <b>Myostatin (pg/ml)</b>            | 1574 (469-4915)      | 2913 (1021-5899)        |
| <b>PhA°</b>                         | 4.6 ± 1.2            | 4.6 ± 1.1               |
| <b>MAMC</b>                         | 21.7 ± 3.8           | 20.3 ± 4.2*             |
| <b>HGS</b>                          | 24 (13.8-28.5)       | 12 (8.6-16.6)*          |
| <b>TSF</b>                          | 18 (12-24)           | 21 (16.2-26)*           |
| <b>ACLF (%)</b>                     | 37.7                 | 19.0*                   |
| <b>Acute decompensation (%)</b>     | 27.5                 | 41.0                    |
| <b>Events of decompensation (%)</b> |                      |                         |
| 1                                   | 65                   | 65                      |
| 2                                   | 15                   | 27                      |
| 3                                   | 5                    | 6                       |
| 4                                   | 4                    | 2                       |
| <b>LT (%)</b>                       | 21.4                 | 14.2                    |
| <b>Death (%)</b>                    | 42                   | 30.8                    |

\* p < 0.05

Data presented as mean ± SD in variables with normal distribution, and median (p25-p75) in variables with non-normal distribution. Student' T test, Mann-Whitney's U and Chi² test

| <b>Table S3. Description of studies evaluating myostatin</b>            |                                                          |                                                          |                                                     |
|-------------------------------------------------------------------------|----------------------------------------------------------|----------------------------------------------------------|-----------------------------------------------------|
|                                                                         | <b><i>Ruiz-Margáin A. et al.</i></b><br><b>(n = 186)</b> | <b><i>Nishikawa H et al.</i></b><br><b>(n = 198)</b>     | <b><i>Skladany L et al.</i></b><br><b>(n = 355)</b> |
| Age                                                                     | 53.4 ± 14                                                | 67.5 (22.6–89.8)                                         | 56 (45-61)                                          |
| Country                                                                 | Mexico                                                   | Japan                                                    | Slovakia                                            |
| Child-Pugh A/B/C (n)                                                    | 56/62/68                                                 | 123/72/3                                                 | -/155/199                                           |
| Hand-grip strength<br>general<br>men/women                              | 14.3 (10-19.3)<br>24/12                                  | N/A<br>N/A                                               | N/A<br>28.5/17.6                                    |
| Mid-arm circumference<br>(cm)<br>general<br>men/women                   | 20.8 ± 4.1<br>21.7/20.3                                  | N/A<br>N/A                                               | N/A<br>27/25                                        |
| Serum myostatin<br>(pg/mL):<br>general<br>men/women<br>Child-Pugh A/B/C | 2476 (647-5682)<br>1574/2913<br>5047/2269 /943           | 2994.4(578-<br>12897)<br>3419.6/2662.4<br>2726/3615/3615 | N/A<br>1959/1790<br>N/A                             |
| Mortality<br>general (%)<br>men/women (%)                               | 34.9<br>42/30.8                                          | N/A                                                      | N/A<br>42.9/40.8                                    |
| Follow-up (days)<br>general<br>men/women                                | 638<br>334/821                                           | 1587<br>N/A                                              | N/A<br>248/256                                      |
| Data presented as mean ± SD and median (p25-p75)                        |                                                          |                                                          |                                                     |
